# Supplementary material
Source: Springer Nature journal article supplement (https://www.springermedizin.de/resource/supplementary/12885_2007_1018_MOESM1_ESM.pdf/9471928)

—◆— Total —■— Environ —▲— Attitude —●— General

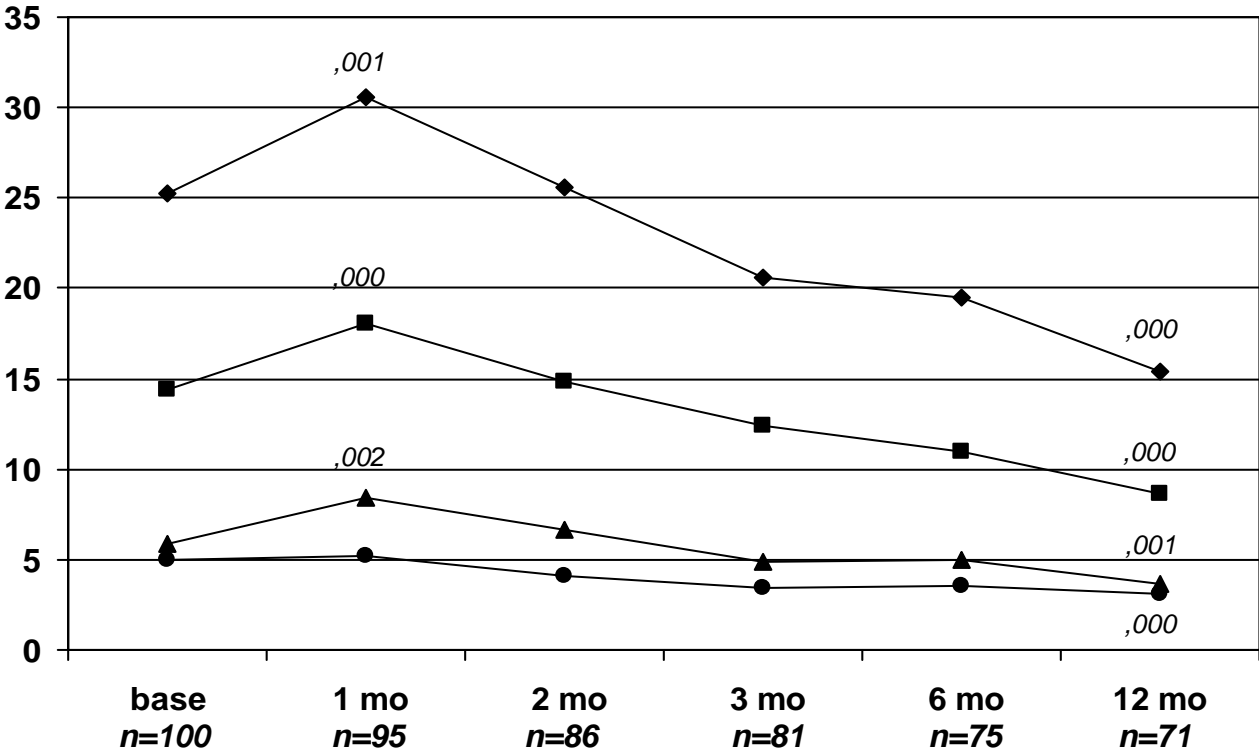

Supplement: MOESM1 [file 9471928]
